# Supplementary material for: Genome expansion by allopolyploidization in the fungal strain Coniochaeta 2T2.1 and its exceptional lignocellulolytic machinery
Source: Biotechnol Biofuels. 2019 Sep 23;12:229. doi: 10.1186/s13068-019-1569-6 (PMC6757388; doi:10.1186/s13068-019-1569-6)
Supplement: Supplementary file 5 — Additional file 5: Table S4. Number of CAZymes across all genomes evaluated in this study. [file 13068_2019_1569_MOESM5_ESM.xlsx]

## Sheet: all_CAZy_families
CAZy family	Conli1	Conlig1	Conioc1_secondary_copies_removed	Conioc1	ConPMI546	LecAK0013_1	Trire2	Neucr_trp3_1	Fusoxy1	Spoth2	Podans1	Aspacri1	Phchr2	Triol1	Penex1	Acrchr1	Mean (excluding Conioc1)	Stdev (excluding Conioc1)
AA1	8	5	6	12	3	3	5	0	6	0	3	3	4	4	3	2	3.5	2.06155
AA11	3	3	4	8	3	5	3	4	4	4	5	2	0	1	2	2	2.92857	1.38689
AA12	6	6	5	10	6	5	1	3	3	3	4	0	1	1	0	2	2.92857	2.12012
AA13	1	1	1	2	1	1	0	1	1	1	1	2	0	0	2	1	0.928571	0.59333
AA14	0	0	1	2	0	0	0	0	1	0	1	0	0	0	0	1	0.214286	0.410326
AA1_2	4	4	5	9	4	4	2	2	3	1	2	0	1	1	3	0	2.21429	1.4232
AA1_3	5	5	5	9	6	5	1	8	9	2	9	3	0	0	3	1	4.07143	3.03466
AA1_dist	0	4	1	3	3	0	0	0	1	0	0	0	0	0	0	0	0.571429	1.23718
AA2	0	0	0	0	0	0	0	0	0	0	0	0	15	0	0	0	1.07143	3.86309
AA2_dist	2	2	2	4	1	2	0	0	1	1	1	0	0	0	1	0	0.785714	0.772618
AA3	4	4	8	11	5	4	0	2	7	0	6	1	0	0	3	2	2.71429	2.28125
AA3_1	2	2	2	4	2	2	0	2	4	3	3	1	1	0	1	1	1.71429	1.09731
AA3_2	10	10	19	28	11	9	10	2	14	3	20	22	34	5	19	7	12.5714	8.3385
AA3_3	3	3	5	9	4	2	2	1	2	1	2	1	3	0	1	3	2	1.06904
AA3_4	0	0	0	0	0	0	0	0	1	0	1	1	1	0	1	0	0.357143	0.479157
AA4	4	4	7	13	4	3	0	0	4	0	4	1	0	1	2	0	1.92857	1.75109
AA5	0	0	1	1	0	0	0	0	0	0	0	0	0	0	0	0	0	0
AA5_1	1	1	1	2	1	1	1	1	1	1	1	0	7	3	0	1	1.42857	1.67819
AA5_2	0	0	0	0	0	0	0	1	4	0	1	0	0	0	2	0	0.571429	1.11575
AA6	1	1	1	2	1	1	1	1	2	1	1	1	4	2	1	1	1.35714	0.811273
AA7	3	2	2	5	2	2	0	1	3	2	3	0	0	0	0	0	1.28571	1.22057
AA7_dist	1	1	3	6	1	1	1	1	3	0	2	2	0	0	3	2	1.28571	0.958315
AA8	10	11	10	15	10	8	2	7	3	6	7	4	2	0	2	3	5.35714	3.41441
AA8_dist	0	0	1	3	0	0	0	0	0	0	2	0	0	0	0	0	0.142857	0.515079
AA9	20	20	21	39	22	22	3	14	15	23	32	11	16	0	4	16	15.5714	8.47445
CBM1	26	26	29	55	30	32	14	21	13	17	30	8	36	0	7	1	18.6429	11.3868
CBM12	0	0	0	0	0	0	0	0	0	0	0	0	1	0	0	0	0.0714286	0.257539
CBM13	2	2	1	2	2	1	2	1	1	1	2	0	8	25	0	0	3.35714	6.29747
CBM14	0	0	0	0	0	0	0	0	0	0	0	3	0	0	1	0	0.285714	0.795395
CBM16	0	0	0	1	0	0	0	0	0	0	0	0	0	0	0	0	0	0
CBM18	17	26	31	50	18	27	8	9	40	10	36	39	1	1	19	5	18.2857	13.0572
CBM20	4	4	4	8	4	4	1	3	2	2	4	4	2	0	3	1	2.71429	1.33248
CBM21	1	1	1	2	1	1	1	1	7	1	1	1	2	2	1	1	1.57143	1.54524
CBM24	16	34	22	26	22	18	4	8	5	2	2	5	0	0	11	0	9.07143	9.73553
CBM32	3	3	1	2	1	2	2	1	3	0	0	0	0	0	3	0	1.28571	1.27775
CBM35	4	4	3	7	4	4	0	1	4	3	2	4	1	0	0	3	2.42857	1.63507
CBM38	0	1	2	5	3	1	0	1	3	0	0	3	0	0	0	0	0.857143	1.18666
CBM42	1	1	1	2	1	1	2	1	2	1	1	1	0	0	1	0	0.928571	0.59333
CBM43	1	1	1	2	1	1	2	1	1	1	1	3	1	1	3	1	1.35714	0.717848
CBM48	3	3	3	6	3	3	3	3	3	3	3	3	3	3	3	3	3	0
CBM5	0	0	0	0	0	0	0	0	0	0	0	0	4	0	0	0	0.285714	1.03016
CBM50	31	31	38	53	18	38	17	18	49	9	41	69	12	3	25	7	26.2857	17.6895
CBM52	1	1	3	5	1	2	0	1	0	1	2	0	0	0	0	0	0.642857	0.717848
CBM6	0	0	0	0	0	1	0	0	1	0	1	1	0	0	0	1	0.357143	0.479157
CBM63	0	1	1	2	1	0	0	0	3	0	0	1	0	0	1	0	0.5	0.823754
CBM66	2	2	1	2	2	1	2	0	0	0	0	0	0	0	0	0	0.642857	0.894997
CBM67	0	0	0	0	0	1	0	0	0	0	0	0	0	0	0	0	0.0714286	0.257539
CE1	7	9	13	21	9	9	2	6	3	6	14	3	4	0	1	6	5.64286	3.67632
CE12	3	3	3	6	4	3	0	1	4	2	1	2	0	0	2	0	1.78571	1.4232
CE15	4	4	4	7	4	4	1	1	0	2	3	0	2	0	0	1	1.85714	1.59719
CE16	4	4	2	4	4	4	2	2	4	2	2	4	7	0	3	2	3.14286	1.59719
CE2	0	0	0	0	0	0	0	0	1	0	0	0	0	0	0	0	0.0714286	0.257539
CE3	5	4	8	14	7	4	3	3	8	3	8	2	0	0	2	2	3.64286	2.49592
CE4	9	9	7	12	7	6	3	5	11	5	5	6	4	5	5	3	5.92857	2.25085
CE5	7	7	7	14	7	8	4	3	15	3	7	4	0	0	5	7	5.5	3.64005
CE7	0	0	0	0	0	0	0	0	2	0	0	0	0	0	0	0	0.142857	0.515079
CE8	8	8	4	8	9	3	0	1	7	2	1	2	2	0	6	0	3.5	3.2238
CE9	2	1	1	2	1	1	1	1	1	1	1	1	1	1	1	1	1.07143	0.257539
EXPN	2	4	4	8	4	3	7	2	9	2	6	3	11	7	2	5	4.78571	2.75625
GH1	3	3	2	4	3	3	2	1	6	1	1	5	2	2	6	3	2.92857	1.62412
GH10	7	7	7	14	7	6	1	4	6	4	8	4	6	0	3	4	4.78571	2.2734
GH105	1	1	2	4	2	2	1	2	4	1	0	5	0	0	1	2	1.57143	1.39971
GH11	6	6	8	14	6	5	3	2	3	8	6	2	1	0	1	3	3.71429	2.34303
GH114	1	1	2	4	1	1	0	1	3	1	1	2	0	0	2	2	1.14286	0.832993
GH115	2	2	2	4	2	3	1	1	5	1	3	1	1	0	0	1	1.64286	1.2877
GH12	1	1	2	4	1	2	2	1	6	1	2	1	2	0	4	6	2.14286	1.80702
GH125	4	4	3	6	3	3	2	3	3	3	4	1	1	0	1	2	2.42857	1.23718
GH127	5	5	3	3	2	3	0	0	2	0	0	1	0	0	1	0	1.35714	1.75691
GH128	6	6	4	8	5	5	4	4	5	2	3	1	5	4	1	1	3.71429	1.74964
GH13	1	1	2	3	1	1	0	0	0	1	0	0	0	0	0	0	0.357143	0.479157
GH130	1	1	2	4	0	0	0	0	0	0	0	0	0	0	0	1	0.214286	0.410326
GH131	4	4	4	8	4	4	0	3	1	2	4	1	3	0	1	2	2.35714	1.49318
GH132	2	2	2	4	2	2	2	2	2	2	2	2	0	0	2	2	1.71429	0.699854
GH133	1	1	1	2	1	1	1	1	1	1	1	1	1	1	1	1	1	0
GH134	0	0	0	0	0	1	0	0	0	0	0	3	0	0	5	0	0.642857	1.44455
GH135	0	0	1	2	0	0	0	0	0	1	1	3	1	0	2	1	0.642857	0.894997
GH139	0	0	0	0	0	0	0	0	1	0	0	0	0	0	0	0	0.0714286	0.257539
GH13_1	2	2	2	4	2	3	1	2	1	2	2	6	2	2	4	1	2.28571	1.27775
GH13_22	3	3	3	6	4	3	0	2	1	1	2	2	1	1	4	0	1.92857	1.27975
GH13_25	1	1	1	2	1	1	1	1	1	1	1	1	1	1	1	1	1	0
GH13_30	0	0	0	0	0	0	0	0	0	0	0	0	0	1	0	0	0.0714286	0.257539
GH13_32	0	0	0	0	0	0	0	0	1	0	0	0	1	0	0	0	0.142857	0.349927
GH13_40	5	6	5	9	3	3	2	2	5	2	1	2	2	1	3	4	2.92857	1.48633
GH13_5	1	1	1	2	1	1	0	2	0	1	2	1	1	1	2	0	1	0.654654
GH13_8	1	1	1	2	1	1	1	1	1	1	1	1	1	1	1	1	1	0
GH140	0	0	0	0	0	0	0	0	0	0	0	1	0	0	0	0	0.0714286	0.257539
GH141	0	0	1	2	0	0	0	0	0	0	0	0	0	0	0	0	0	0
GH142	0	0	0	0	0	0	0	0	1	0	0	1	0	0	0	0	0.142857	0.349927
GH145	0	0	1	2	0	1	0	0	2	0	1	0	0	0	0	0	0.285714	0.589015
GH146	0	0	1	2	0	0	0	0	1	0	0	0	0	0	0	1	0.142857	0.349927
GH15	3	3	3	6	3	3	2	2	4	2	3	2	2	2	3	2	2.57143	0.6227
GH152	0	0	1	2	0	0	0	0	2	0	1	0	0	0	0	1	0.285714	0.589015
GH16	17	17	20	40	18	16	16	16	27	15	13	14	22	9	16	14	16.4286	4.0305
GH17	5	5	5	10	5	5	5	5	6	4	4	5	2	1	5	5	4.42857	1.29363
GH18	16	15	18	30	14	18	20	12	32	10	20	30	11	4	16	12	16.4286	7.20827
GH2	9	10	6	12	7	6	8	5	9	7	8	11	2	3	10	10	7.5	2.61179
GH20	1	1	1	2	2	1	3	2	4	1	1	2	4	2	3	2	2.07143	1.03263
GH23	0	0	0	0	0	0	0	0	0	0	0	0	1	1	0	1	0.214286	0.410326
GH24	0	0	1	2	1	0	1	0	1	1	1	1	0	2	0	3	0.785714	0.860114
GH25	1	1	1	2	1	1	1	1	0	1	0	3	1	0	1	2	1	0.755929
GH26	0	0	0	0	0	0	0	1	0	1	1	2	0	0	1	0	0.428571	0.6227
GH27	4	4	4	8	3	3	8	0	4	2	2	5	3	0	0	2	2.85714	2.09956
GH28	10	10	11	22	10	6	4	2	10	2	0	14	5	1	9	2	6.07143	4.23361
GH29	0	0	0	0	0	0	0	0	2	0	0	0	0	0	0	0	0.142857	0.515079
GH3	18	19	18	33	14	17	13	10	34	13	11	19	10	3	25	10	15.4286	7.30669
GH30	0	0	0	0	0	0	0	0	0	0	0	0	1	0	0	0	0.0714286	0.257539
GH30_3	2	2	1	2	2	1	2	1	0	0	0	0	1	0	1	0	0.857143	0.832993
GH30_5	1	1	1	2	1	1	1	1	0	1	1	0	0	0	0	0	0.571429	0.494872
GH30_7	2	2	3	6	3	2	2	0	1	2	2	0	0	0	0	0	1.14286	1.05946
GH31	10	10	12	22	9	14	4	5	9	6	5	9	6	3	6	7	7.35714	2.84372
GH32	4	5	7	12	5	4	0	2	10	0	0	8	0	2	4	0	3.14286	3.06727
GH33	0	0	0	0	0	0	0	0	1	1	0	1	0	0	1	1	0.357143	0.479157
GH35	3	5	3	6	3	3	1	3	6	1	1	6	3	0	4	4	3.07143	1.79142
GH36	1	1	2	4	1	2	2	1	4	1	1	4	0	2	2	2	1.71429	1.09731
GH37	2	2	2	4	2	2	2	2	2	2	2	1	2	2	1	2	1.85714	0.349927
GH38	1	1	1	2	1	1	1	1	1	1	1	1	1	1	1	1	1	0
GH39	0	0	3	4	0	0	1	0	4	0	0	0	0	0	0	0	0.357143	1.04247
GH43	18	18	22	42	15	19	2	7	31	13	13	24	4	1	9	13	13.3571	8.15569
GH45	4	5	5	10	5	4	1	1	1	1	3	1	2	0	0	2	2.14286	1.68426
GH47	12	11	13	26	13	11	8	8	10	8	9	6	5	3	6	8	8.42857	2.71804
GH49	0	0	0	0	0	0	0	0	1	0	0	1	0	0	0	1	0.214286	0.410326
GH5	1	1	1	2	1	1	0	0	1	0	1	0	0	0	0	0	0.428571	0.494872
GH51	3	3	2	4	2	4	0	1	3	2	1	2	2	1	4	2	2.14286	1.12486
GH53	1	1	1	2	1	1	0	1	2	1	1	1	1	0	1	1	0.928571	0.457366
GH54	1	1	1	2	1	1	2	1	2	0	0	1	0	0	1	0	0.785714	0.673856
GH55	9	12	10	17	9	13	6	6	3	6	7	9	2	0	6	2	6.42857	3.65893
GH5_11	1	1	1	2	1	1	0	0	0	1	1	0	0	0	0	1	0.5	0.5
GH5_12	1	1	1	2	1	1	1	1	2	1	1	1	2	2	2	1	1.28571	0.451754
GH5_15	0	0	0	0	0	1	1	0	3	0	0	1	1	0	1	1	0.642857	0.811273
GH5_16	1	1	1	2	1	1	0	1	2	1	1	1	0	0	0	2	0.857143	0.638877
GH5_22	1	1	1	2	2	1	0	0	2	0	1	0	2	1	1	1	0.928571	0.70349
GH5_23	0	0	1	2	0	0	0	0	1	0	0	3	0	0	0	0	0.285714	0.795395
GH5_24	1	1	1	2	1	1	1	1	1	1	1	0	0	0	0	1	0.714286	0.451754
GH5_27	0	0	0	0	0	0	0	0	1	0	0	0	0	0	0	0	0.0714286	0.257539
GH5_31	0	0	1	2	0	0	0	0	1	0	0	0	1	0	0	0	0.142857	0.349927
GH5_4	1	1	1	2	1	1	0	0	0	0	0	1	0	0	1	0	0.428571	0.494872
GH5_5	5	5	5	10	5	4	2	1	2	2	3	3	2	0	4	1	2.78571	1.56655
GH5_50	0	0	0	0	0	0	0	0	0	0	0	0	2	1	0	0	0.214286	0.557875
GH5_7	4	4	3	6	4	4	1	1	3	2	2	5	3	0	2	1	2.57143	1.44984
GH5_9	1	1	1	2	1	1	1	1	1	1	1	2	6	4	2	1	1.71429	1.4357
GH5_dist	0	0	0	0	0	2	1	0	1	0	0	0	0	0	0	1	0.357143	0.610286
GH6	3	3	3	6	3	3	1	3	1	3	5	2	1	0	1	1	2.14286	1.30149
GH62	1	1	2	3	2	1	1	0	1	2	2	2	0	0	0	1	1	0.755929
GH63	1	1	1	2	1	1	1	1	1	1	1	1	1	0	1	1	0.928571	0.257539
GH64	2	2	2	4	1	2	3	2	7	1	1	0	0	0	1	4	1.85714	1.80702
GH65	1	1	1	2	1	0	2	0	1	0	0	1	0	0	1	0	0.571429	0.6227
GH67	1	1	1	2	1	1	1	1	2	1	1	1	0	0	1	1	0.928571	0.457366
GH7	8	8	6	12	9	9	2	5	3	6	6	3	8	0	2	3	5.14286	2.87494
GH71	9	11	11	15	11	8	4	6	4	3	3	6	3	4	7	2	5.78571	2.90759
GH72	4	4	4	8	4	4	5	5	3	5	6	5	1	1	7	4	4.14286	1.59719
GH74	1	1	1	2	1	1	1	1	1	1	1	2	4	0	0	0	1.07143	0.960973
GH75	1	1	1	2	1	1	3	1	2	2	1	2	0	0	2	1	1.28571	0.795395
GH76	10	11	15	25	10	10	8	10	9	10	11	7	0	0	9	6	7.92857	3.51455
GH78	3	3	7	13	4	5	1	1	19	1	1	10	1	1	7	2	4.21429	4.85767
GH79	3	3	4	7	4	2	4	2	3	2	3	2	8	2	5	0	3.07143	1.79142
GH81	1	1	1	2	1	1	2	1	1	1	1	1	0	0	1	3	1.07143	0.70349
GH84	0	0	0	0	0	0	0	0	0	0	0	0	0	0	1	0	0.0714286	0.257539
GH85	0	0	0	0	0	0	0	0	0	0	0	0	1	0	0	0	0.0714286	0.257539
GH88	1	2	4	7	2	1	0	0	3	0	0	3	1	0	0	1	1	1.06904
GH89	1	1	1	2	1	1	2	0	0	0	0	0	2	0	0	0	0.571429	0.728431
GH9	0	0	0	0	0	0	0	0	0	0	0	0	1	1	0	0	0.142857	0.349927
GH92	4	4	4	8	4	3	7	2	0	2	2	5	4	1	4	4	3.28571	1.70832
GH93	2	2	2	4	2	3	0	2	5	3	3	2	0	0	2	2	2	1.30931
GH94	1	1	1	2	1	1	0	1	0	1	1	0	0	0	0	1	0.571429	0.494872
GH95	1	1	1	2	1	1	4	0	2	1	0	3	1	0	1	2	1.28571	1.09731
GT1	13	13	15	26	13	12	8	8	20	7	8	11	9	6	12	7	10.5	3.5807
GT15	4	4	3	6	3	4	4	5	4	3	5	3	2	1	3	5	3.57143	1.11575
GT17	1	1	2	3	1	1	1	1	2	1	1	0	1	1	0	0	0.857143	0.515079
GT18	0	0	0	0	0	0	0	0	0	0	0	0	0	4	0	0	0.285714	1.03016
GT2	15	15	16	30	14	14	13	12	24	13	16	13	13	9	16	13	14.2857	3.19438
GT20	3	3	3	6	3	3	4	3	3	3	3	5	3	3	5	3	3.35714	0.717848
GT21	1	1	1	2	1	1	1	1	1	1	1	1	1	1	1	1	1	0
GT22	4	4	4	8	4	4	4	4	4	4	4	4	4	3	4	4	3.92857	0.257539
GT24	1	1	1	2	1	1	1	1	1	1	1	1	1	1	1	1	1	0
GT25	2	2	4	8	2	3	1	2	0	3	1	4	0	0	2	0	1.57143	1.23718
GT3	1	1	1	2	1	1	1	1	1	1	1	1	1	1	1	1	1	0
GT31	6	6	6	12	6	6	7	4	6	5	8	8	1	3	6	6	5.57143	1.80136
GT32	10	10	7	14	11	10	8	4	6	5	6	7	1	2	9	4	6.64286	3.06145
GT33	1	1	1	2	1	1	1	1	1	1	1	1	1	1	1	1	1	0
GT34	2	2	2	4	2	2	2	3	3	2	2	3	0	0	3	2	2	0.92582
GT35	1	1	1	2	1	1	1	1	1	1	1	1	1	1	2	1	1.07143	0.257539
GT39	3	3	3	6	3	3	3	3	3	3	3	3	3	3	3	3	3	0
GT4	5	5	7	13	5	4	5	6	6	5	6	7	4	4	7	6	5.35714	0.971534
GT41	1	1	1	2	1	1	1	1	1	1	1	1	1	0	1	1	0.928571	0.257539
GT47	0	0	0	0	0	0	0	0	0	0	0	0	0	2	0	0	0.142857	0.515079
GT48	1	1	1	2	2	1	1	1	1	1	1	1	2	1	1	1	1.14286	0.349927
GT49	0	0	0	0	0	0	0	0	0	0	0	0	1	0	0	0	0.0714286	0.257539
GT5	3	3	3	6	3	3	0	2	1	1	2	2	1	1	4	0	1.85714	1.18666
GT50	1	1	1	2	1	1	1	1	1	1	1	1	1	1	1	1	1	0
GT55	0	0	0	0	0	0	0	1	0	1	1	0	0	0	0	0	0.214286	0.410326
GT57	2	2	2	4	2	2	2	2	2	2	2	2	2	0	2	2	1.85714	0.515079
GT58	1	1	1	2	1	1	1	1	1	1	1	1	1	1	1	1	1	0
GT59	1	1	1	2	1	1	1	1	1	1	1	1	1	0	1	1	0.928571	0.257539
GT61	1	1	1	1	2	1	0	0	0	0	0	1	0	0	1	2	0.642857	0.717848
GT62	3	3	3	6	3	3	3	3	3	3	3	3	0	0	3	3	2.57143	1.04978
GT64	0	0	0	0	0	0	2	0	2	0	0	0	0	0	0	1	0.357143	0.717848
GT66	1	1	1	2	1	1	1	1	1	1	1	1	1	1	1	1	1	0
GT69	3	3	4	8	3	4	3	2	3	2	3	3	2	3	2	0	2.57143	0.903508
GT71	2	2	6	11	3	2	1	1	3	1	0	2	0	3	3	1	1.71429	1.03016
GT76	1	1	1	2	1	1	1	1	1	1	1	1	1	1	1	1	1	0
GT8	2	2	3	5	2	2	3	2	8	4	4	5	9	2	8	2	3.92857	2.49182
GT90	5	4	5	10	4	4	6	4	6	4	3	2	1	8	5	5	4.35714	1.67362
Myosin_motor	2	2	2	4	2	2	2	2	2	2	2	2	2	2	2	2	2	0
PL1	0	0	0	0	0	0	0	0	0	1	2	0	0	0	0	0	0.214286	0.557875
PL11_2	0	0	0	0	0	0	0	0	1	0	0	1	0	0	0	0	0.142857	0.349927
PL14	0	0	0	0	0	0	0	0	0	0	0	0	1	0	0	0	0.0714286	0.257539
PL14_3	0	0	0	0	0	0	0	0	0	0	0	0	0	2	0	0	0.142857	0.515079
PL14_4	0	0	0	0	0	0	0	0	0	0	0	0	3	1	0	0	0.285714	0.795395
PL14_5	0	0	0	0	0	0	0	0	0	0	0	0	1	0	0	0	0.0714286	0.257539
PL1_10	0	0	0	0	0	0	0	0	1	1	1	0	0	0	0	1	0.285714	0.451754
PL1_2	0	0	0	0	0	0	0	0	1	0	0	2	0	0	0	0	0.214286	0.557875
PL1_4	0	0	1	2	1	1	0	0	6	1	0	6	0	0	3	0	1.28571	2.08493
PL1_7	0	0	1	1	1	1	0	1	3	2	1	2	0	0	1	1	0.928571	0.883523
PL1_9	0	0	0	0	0	0	0	0	1	0	0	0	0	0	0	0	0.0714286	0.257539
PL20	1	1	1	2	1	1	2	1	0	1	0	1	0	0	2	1	0.857143	0.638877
PL26	0	0	0	0	0	0	0	0	1	0	0	1	0	0	0	1	0.214286	0.410326
PL27	0	0	0	0	0	0	0	0	0	0	0	1	0	0	0	0	0.0714286	0.257539
PL3_2	1	1	1	2	1	1	0	1	7	1	2	5	0	0	1	2	1.64286	1.91263
PL4_1	1	1	2	4	2	1	0	1	1	1	1	2	0	0	1	0	0.857143	0.638877
PL4_3	1	1	1	2	1	1	0	0	2	0	0	2	0	0	1	0	0.642857	0.717848
PL4_5	1	1	1	2	1	1	0	0	0	0	0	0	0	0	0	0	0.285714	0.451754
PL7_4	2	2	1	2	2	0	2	0	0	0	0	0	0	0	0	1	0.642857	0.894997
PL8_4	0	0	0	0	0	0	1	0	0	0	0	0	1	1	0	0	0.214286	0.410326
PL9_3	0	0	0	0	0	0	0	0	1	0	0	1	0	0	0	0	0.142857	0.349927
